# Supplementary material
Source: PubMed Central journal article supplement (PMC6128491)
Supplement: jamadermatol-154-789-s001.pdf [file jamadermatol-154-789-s001.pdf]

## Supplementary Online Content

Wendt J, Mueller C, Rauscher S, Fae I, Fischer G, Okamoto I. Contributions by *MC1R* Variants to Melanoma Risk in Males and Females. Published online June 13, 2018. *JAMA*. doi:10.1001/jamadermatol.2018.1252

**eTable 1.** Pigmentation phenotype in males and females stratified for cases and controls

**eTable 2.** Frequency of *MC1R* variants in males and females

**eTable 3a.** Sun exposure variables and melanoma risk in males

**eTable 3b.** Sun exposure variables and melanoma risk in females

**eTable 4a.** *MC1R* variants and pigmentation phenotype in males

**eTable 4b.** *MC1R* variants and pigmentation phenotype in females

**eTable 5a.** *MC1R* variants and pigmentation phenotype in Cases

**eTable 5b.** *MC1R* variants and pigmentation phenotype in Controls

This supplementary material has been provided by the authors to give readers additional information about their work.

**eTable 1. Pigmentation phenotype in males and females stratified for Cases and Controls**

| <b>CASES</b>          |              |                 |        |               |        |                  |      |      |         |
|-----------------------|--------------|-----------------|--------|---------------|--------|------------------|------|------|---------|
| Variable <sup>a</sup> |              | FEMALES (n=473) |        | MALES (n=518) |        | AOR <sup>b</sup> | 95%  | CI   | P Value |
|                       |              | n               | %      | n             | %      |                  |      |      |         |
| Skin Phototype        | I/II         | 409             | (77,0) | 421           | (68,9) | 1,33             | 0,88 | 2,01 | 0,180   |
|                       | III          | 67              | (12,6) | 104           | (17,0) | 0,91             | 0,54 | 1,53 | 0,719   |
|                       | IV/V         | 55              | (10,4) | 86            | (14,1) | Ref              |      |      |         |
| Burning               | high         | 135             | (24,8) | 118           | (18,6) | 1,41             | 0,97 | 2,06 | 0,073   |
|                       | intermediate | 292             | (53,6) | 356           | (56,1) | 0,99             | 0,72 | 1,35 | 0,949   |
|                       | low          | 118             | (21,7) | 161           | (25,4) | Ref              |      |      |         |
| Tanning               | low          | 66              | (12,1) | 49            | (7,7)  | 2,03             | 1,19 | 3,45 | 0,009   |
|                       | intermediate | 424             | (77,8) | 486           | (76,5) | 1,34             | 0,91 | 1,98 | 0,138   |
|                       | high         | 55              | (10,1) | 100           | (15,7) | Ref              |      |      |         |
| Haircolor             | red          | 57              | (10,5) | 39            | (6,1)  | 2,22             | 1,37 | 3,60 | 0,001   |
|                       | blond        | 156             | (28,6) | 142           | (22,3) | 1,75             | 1,27 | 2,41 | 0,001   |
|                       | light brown  | 134             | (24,6) | 144           | (22,6) | 1,67             | 1,20 | 2,32 | 0,002   |
|                       | brown/black  | 198             | (36,3) | 311           | (48,9) | Ref              |      |      |         |
| Freckles              | yes          | 209             | (40,2) | 183           | (31,0) | 1,31             | 1,00 | 1,72 | 0,051   |
|                       | no           | 311             | (59,8) | 407           | (69,0) | Ref              |      |      |         |
| <b>CONTROLS</b>       |              |                 |        |               |        |                  |      |      |         |
| Variable <sup>a</sup> |              | FEMALES (n=432) |        | MALES (368)   |        | AOR <sup>b</sup> | 95%  | CI   | P Value |
|                       |              | n               | %      | n             | %      |                  |      |      |         |
| Skin Phototype        | I/II         | 332             | (63,8) | 298           | (57,9) | 1,47             | 1,02 | 2,13 | 0,039   |
|                       | III          | 94              | (18,1) | 92            | (17,9) | 1,20             | 0,75 | 1,90 | 0,450   |
|                       | IV/V         | 94              | (18,1) | 125           | (24,3) | Ref              |      |      |         |
| Burning               | high         | 65              | (12,0) | 59            | (11,3) | 1,26             | 0,78 | 2,04 | 0,345   |
|                       | intermediate | 291             | (53,7) | 270           | (51,5) | 1,00             | 0,74 | 1,36 | 0,999   |
|                       | low          | 186             | (34,3) | 195           | (37,2) | Ref              |      |      |         |
| Tanning               | low          | 48              | (8,9)  | 32            | (6,1)  | 2,72             | 1,43 | 5,18 | 0,002   |
|                       | intermediate | 418             | (77,3) | 383           | (73,1) | 1,72             | 1,18 | 2,51 | 0,005   |
|                       | high         | 75              | (13,9) | 109           | (20,8) | Ref              |      |      |         |
| Haircolor             | red          | 36              | (6,6)  | 14            | (2,7)  | 2,81             | 1,39 | 5,67 | 0,004   |
|                       | blond        | 100             | (18,4) | 88            | (16,8) | 1,50             | 1,01 | 2,23 | 0,043   |
|                       | light brown  | 166             | (30,6) | 152           | (29,0) | 1,43             | 1,02 | 1,99 | 0,037   |
|                       | brown/black  | 241             | (44,4) | 271           | (51,6) | Ref              |      |      |         |
| Freckles              | yes          | 167             | (31,3) | 112           | (22,9) | 1,71             | 1,23 | 2,37 | 0,001   |
|                       | no           | 366             | (68,7) | 378           | (77,1) | Ref              |      |      |         |

Abbreviations: AOR= adjusted Odds Ratio; CI=Confidence Interval; Ref=Reference group

<sup>a</sup> The single variables do not sum up to the total number of females and males because of missing data

<sup>b</sup> =adjusted for age

**eTable 2. Frequency of MC1R variants in males and females**

| Variants <sup>a</sup>                          |                        | FEMALES<br>(n=905) |        | MALES<br>(n=886) |        | AOR <sup>e</sup> | 0,95 | CI   | P<br>Value |
|------------------------------------------------|------------------------|--------------------|--------|------------------|--------|------------------|------|------|------------|
|                                                |                        | n                  | %      | n                | %      |                  |      |      |            |
| <b>MC1R</b>                                    | <b>variant</b>         | 686                | (75,8) | 694              | (78,3) | 0,90             | 0,72 | 1,12 | 0,333      |
|                                                | <b>wt</b>              | 219                | (24,2) | 192              | (21,7) |                  |      |      |            |
|                                                |                        |                    |        |                  |        | 0,94             | 0,73 | 1,21 | 0,636      |
| <b>Number of<br/>MC1R variants</b>             | <b>≥2</b>              | 324                | (35,8) | 316              | (35,7) | 0,86             | 0,67 | 1,10 | 0,223      |
|                                                | <b>1</b>               | 362                | (40,0) | 378              | (42,7) |                  |      |      |            |
|                                                | <b>0<sup>c</sup></b>   | 219                | (24,2) | 192              | (21,7) | 0,97             | 0,62 | 1,50 | 0,875      |
|                                                |                        |                    |        |                  |        | 1,02             | 0,74 | 1,41 | 0,911      |
| <b>Combination<br/>of variants<sup>b</sup></b> | <b>R/R</b>             | 49                 | (5,4)  | 48               | (5,4)  | 0,77             | 0,58 | 1,02 | 0,068      |
|                                                | <b>R/r</b>             | 113                | (12,5) | 107              | (12,1) | 0,92             | 0,63 | 1,34 | 0,654      |
|                                                | <b>R/0</b>             | 152                | (16,8) | 187              | (21,1) | 1,03             | 0,80 | 1,32 | 0,826      |
|                                                | <b>r/r</b>             | 69                 | (7,6)  | 71               | (8,0)  |                  |      |      |            |
|                                                | <b>r/0</b>             | 273                | (30,2) | 246              | (27,8) | 0,90             | 0,72 | 1,12 | 0,333      |
|                                                | <b>0/0<sup>d</sup></b> | 249                | (27,5) | 227              | (25,6) |                  |      |      |            |

Sequencing of MC1R was performed for 1791 participants.

Abbreviations: AOR= adjusted Odds Ratio; CI=Confidence Interval; Ref=Reference group

<sup>a</sup> The single variants do not sum up to the total number of sequenced cases and controls because of missing data

<sup>b</sup> = R= 86\_87insA, R142H, R151C, R160W, D294H; r= V60L, D84E, V92M, I155T, R163Q

<sup>c</sup>=wild type [wt]

<sup>d</sup>=participants who did not carry any "r" or "R"

<sup>e</sup>= adjusted for melanoma status

**eTable 3a. Sun exposure variables and melanoma risk in males**

| <b>MALES</b>                         |               |                          |                             |                                 |                |
|--------------------------------------|---------------|--------------------------|-----------------------------|---------------------------------|----------------|
|                                      |               | <b>CASES<br/>(n=518)</b> | <b>CONTROLS<br/>(n=368)</b> | <b>AOR<sup>b</sup> (95% CI)</b> | <b>P Value</b> |
| <b>Variable<sup>a</sup></b>          |               | <b>n (%)</b>             | <b>n (%)</b>                |                                 |                |
| <b>Freckling Face</b>                | <b>++,+++</b> | 214 (41,4)               | 125 (34,2)                  | 1,93 (1,2-3,1)                  | 0,007          |
|                                      | <b>+</b>      | 240 (46,4)               | 161 (44,1)                  | 1,74 (1,14-2,66)                | 0,010          |
|                                      | <b>0</b>      | 63 (12,2)                | 79 (21,6)                   | Ref                             |                |
| <b>Freckling Back</b>                | <b>++,+++</b> | 295 (57,3)               | 140 (38,5)                  | 2,82 (1,73-4,6)                 | <0,001         |
|                                      | <b>+</b>      | 169 (32,8)               | 157 (43,1)                  | 1,43 (0,91-2,25)                | 0,121          |
|                                      | <b>0</b>      | 51 (9,9)                 | 67 (18,4)                   | Ref                             |                |
| <b>Freckling Hands</b>               | <b>++,+++</b> | 89 (17,2)                | 39 (10,7)                   | 1,71 (1,05-2,77)                | 0,030          |
|                                      | <b>+</b>      | 221 (42,7)               | 146 (40,1)                  | 1,18 (0,84-1,65)                | 0,335          |
|                                      | <b>0</b>      | 207 (40,0)               | 179 (49,2)                  | Ref                             |                |
| <b>Wrinkling Face</b>                | <b>++,+++</b> | 268 (51,8)               | 155 (42,2)                  | 2,79 (1,58-4,92)                | <0,001         |
|                                      | <b>+</b>      | 200 (38,7)               | 140 (38,1)                  | 2,22 (1,37-3,61)                | 0,001          |
|                                      | <b>0</b>      | 49 (9,5)                 | 72 (19,6)                   | Ref                             |                |
| <b>Wrinkling Neck</b>                | <b>++,+++</b> | 279 (54,2)               | 133 (36,5)                  | 3,65 (2,22-6,02)                | <0,001         |
|                                      | <b>+</b>      | 185 (35,9)               | 153 (42,0)                  | 1,99 (1,28-3,1)                 | 0,002          |
|                                      | <b>0</b>      | 51 (9,9)                 | 78 (21,4)                   | Ref                             |                |
| <b>Solar lentigines Face</b>         | <b>++,+++</b> | 132 (25,5)               | 91 (24,9)                   | 2,21 (1,36-3,58)                | 0,001          |
|                                      | <b>+</b>      | 292 (56,5)               | 139 (38,1)                  | 3,14 (2,14-4,6)                 | <0,001         |
|                                      | <b>0</b>      | 93 (18,0)                | 135 (37,0)                  | Ref                             |                |
| <b>Solar lentigines Back</b>         | <b>++,+++</b> | 244 (47,5)               | 114 (31,5)                  | 4,2 (2,6-6,78)                  | <0,001         |
|                                      | <b>+</b>      | 210 (40,9)               | 148 (40,9)                  | 2,65 (1,72-4,07)                | <0,001         |
|                                      | <b>0</b>      | 60 (11,7)                | 100 (27,6)                  | Ref                             |                |
| <b>Solar lentigines Hand</b>         | <b>++,+++</b> | 163 (31,5)               | 70 (19,3)                   | 3,18 (1,96-5,17)                | <0,001         |
|                                      | <b>+</b>      | 224 (43,3)               | 146 (40,2)                  | 1,98 (1,35-2,91)                | <0,001         |
|                                      | <b>0</b>      | 130 (25,1)               | 147 (40,5)                  | Ref                             |                |
| <b>Holiday weeks in life</b>         | <b>≥18</b>    | 180 (35,0)               | 138 (37,6)                  | 0,96 (0,68-1,35)                | 0,820          |
|                                      | <b>9-17</b>   | 195 (37,9)               | 120 (32,7)                  | 1,27 (0,9-1,78)                 | 0,175          |
|                                      | <b>&lt;9</b>  | 139 (27,0)               | 109 (29,7)                  | Ref                             |                |
| <b>Sunburns in life</b>              | <b>≥20</b>    | 224 (43,6)               | 110 (30,0)                  | 2,24 (1,58-3,17)                | <0,001         |
|                                      | <b>2-19</b>   | 165 (32,1)               | 135 (36,8)                  | 1,37 (0,96-1,94)                | 0,081          |
|                                      | <b>0-1</b>    | 125 (24,3)               | 122 (33,2)                  | Ref                             |                |
| <b>Outdoor Occupation in life</b>    | <b>yes</b>    | 259 (50,3)               | 192 (52,3)                  | 0,9 (0,69-1,18)                 | 0,431          |
|                                      | <b>no</b>     | 256 (49,7)               | 175 (47,7)                  | Ref                             |                |
| <b>Recreational Time (hours/day)</b> | <b>&gt; 3</b> | 397 (77,8)               | 276 (75,0)                  | 0,53 (0,22-1,28)                | 0,156          |
|                                      | <b>1 - 3</b>  | 94 (18,4)                | 85 (23,1)                   | 0,42(0,17-1,05)                 | 0,065          |
|                                      | <b>&lt; 1</b> | 19 (3,7)                 | 7 (1,9)                     | Ref                             |                |

Abbreviations: AOR= adjusted Odds Ratio; CI=Confidence Interval; Ref=Reference group

<sup>a</sup> The single variables do not sum up to the total number of females and males because of missing data

<sup>b</sup>=adjusted for age

**eTable 3b. Sun exposure variables and melanoma risk in females**

| FEMALES                              |        |                           |                              |                           |         |
|--------------------------------------|--------|---------------------------|------------------------------|---------------------------|---------|
| Variable <sup>a</sup>                |        | CASES<br>(n=473)<br>n (%) | CONTROLS<br>(n=432)<br>n (%) | AOR <sup>b</sup> (95% CI) | P Value |
| <b>Freckling Face</b>                | ++,+++ | 155 (32,8)                | 148 (34,9)                   | 0,81 (0,53-1,23)          | 0,328   |
|                                      | +      | 239 (50,5)                | 195 (46,0)                   | 1,04 (0,71-1,52)          | 0,843   |
|                                      | 0      | 79 (16,7)                 | 81 (19,1)                    | Ref                       |         |
| <b>Freckling Back</b>                | ++,+++ | 187 (39,6)                | 120 (28,5)                   | 3,02 (1,98-4,62)          | <0,001  |
|                                      | +      | 224 (47,5)                | 176 (41,8)                   | 2,51 (1,71-3,69)          | <0,001  |
|                                      | 0      | 61 (12,9)                 | 125 (29,7)                   | Ref                       |         |
| <b>Freckling Hands</b>               | ++,+++ | 56 (11,9)                 | 33 (7,8)                     | 2,02 (1,22-3,33)          | 0,006   |
|                                      | +      | 211 (44,8)                | 131 (31,0)                   | 1,94 (1,42-2,67)          | <0,001  |
|                                      | 0      | 204 (43,3)                | 258 (61,1)                   | Ref                       |         |
| <b>Wrinkling Face</b>                | ++,+++ | 203 (42,9)                | 175 (40,8)                   | 1,21 (0,73-1,99)          | 0,456   |
|                                      | +      | 192 (40,6)                | 139 (32,4)                   | 1,7 (1,13-2,55)           | 0,010   |
|                                      | 0      | 78 (16,5)                 | 115 (26,8)                   | Ref                       |         |
| <b>Wrinkling Neck</b>                | ++,+++ | 120 (25,5)                | 62 (14,8)                    | 3,68 (2,31-5,85)          | <0,001  |
|                                      | +      | 228 (48,5)                | 158 (37,6)                   | 2,6 (1,83-3,69)           | <0,001  |
|                                      | 0      | 122 (26,0)                | 200 (47,6)                   | Ref                       |         |
| <b>Solar lentigines Face</b>         | ++,+++ | 79 (16,7)                 | 65 (15,4)                    | 1,59 (1,01-2,51)          | 0,046   |
|                                      | +      | 262 (55,5)                | 170 (40,3)                   | 2,07 (1,49-2,89)          | <0,001  |
|                                      | 0      | 131 (27,8)                | 187 (44,3)                   | Ref                       |         |
| <b>Solar lentigines Back</b>         | ++,+++ | 160 (34,0)                | 88 (21,0)                    | 3,25 (2,14-4,93)          | <0,001  |
|                                      | +      | 226 (48,0)                | 180 (42,9)                   | 2,24 (1,56-3,23)          | <0,001  |
|                                      | 0      | 85 (18,0)                 | 152 (36,2)                   | Ref                       |         |
| <b>Solar lentigines Hand</b>         | ++,+++ | 152 (32,3)                | 98 (23,3)                    | 2,18 (1,35-3,52)          | 0,001   |
|                                      | +      | 194 (41,2)                | 152 (36,1)                   | 1,77 (1,22-2,58)          | 0,003   |
|                                      | 0      | 125 (26,5)                | 171 (40,6)                   | Ref                       |         |
| <b>Holiday weeks in life</b>         | ≥18    | 130 (27,8)                | 130 (30,4)                   | 0,82 (0,59-1,14)          | 0,237   |
|                                      | 9-17   | 161 (34,4)                | 140 (32,7)                   | 0,99 (0,72-1,35)          | 0,931   |
|                                      | <9     | 177 (37,8)                | 158 (36,9)                   | Ref                       |         |
| <b>Sunburns in life</b>              | ≥20    | 164 (34,8)                | 84 (19,6)                    | 2,41 (1,7-3,42)           | <0,001  |
|                                      | 2-19   | 142 (30,1)                | 166 (38,7)                   | 1,08 (0,78-1,49)          | 0,633   |
|                                      | 0-1    | 165 (35,0)                | 179 (41,7)                   | Ref                       |         |
| <b>Outdoor Occupation in life</b>    | yes    | 134 (28,3)                | 156 (36,3)                   | 0,64 (0,48-0,86)          | 0,003   |
|                                      | no     | 339 (71,7)                | 274 (63,7)                   | Ref                       |         |
| <b>Recreational Time (hours/day)</b> | > 3    | 330 (70,2)                | 315 (73,1)                   | 0,75 (0,37-1,52)          | 0,427   |
|                                      | 1 - 3  | 119 (25,3)                | 102 (23,7)                   | 0,85 (0,41-1,76)          | 0,654   |
|                                      | < 1    | 21 (4,5)                  | 14 (3,2)                     | Ref                       |         |

Abbreviations: AOR= adjusted Odds Ratio; CI=Confidence Interval; Ref=Reference group

<sup>a</sup> The single variables do not sum up to the total number of females and males because of missing data

<sup>b</sup>=adjusted for age

**eTable 4a. MC1R variants and pigmentation phenotype in males**

| Combination of MC1R variants <sup>a</sup> | Variable <sup>c</sup> |        |              |        |      |        | Adjusted for age and melanoma status |       |       |         |              |      |      |         |        |
|-------------------------------------------|-----------------------|--------|--------------|--------|------|--------|--------------------------------------|-------|-------|---------|--------------|------|------|---------|--------|
|                                           | Skin Phototype        |        |              |        |      |        | Skin Phototype (IV/V=Ref)            |       |       |         |              |      |      |         |        |
|                                           | I/II                  |        | III          |        | IV/V |        | I/II                                 |       |       |         | III          |      |      |         |        |
|                                           | n                     | %      | n            | %      | n    | %      | AOR                                  | 0,95  | CI    | P Value | AOR          | 0,95 | CI   | P Value |        |
| R/R                                       | 34                    | (6,1)  | 4            | (2,7)  | 6    | (3,9)  | R/R                                  | 3,17  | 1,24  | 8,12    | 0,016        | 0,88 | 0,23 | 3,34    | 0,855  |
| R/r                                       | 85                    | (15,3) | 10           | (6,7)  | 9    | (5,9)  | R/r                                  | 4,64  | 2,15  | 10,02   | <0,001       | 1,31 | 0,49 | 3,51    | 0,596  |
| R/O                                       | 123                   | (22,2) | 31           | (20,8) | 27   | (17,8) | R/O                                  | 2,30  | 1,35  | 3,92    | 0,002        | 1,37 | 0,71 | 2,62    | 0,346  |
| r/r                                       | 50                    | (9,0)  | 11           | (7,4)  | 6    | (3,9)  | r/r                                  | 4,54  | 1,81  | 11,38   | 0,001        | 2,37 | 0,81 | 6,96    | 0,117  |
| r/O                                       | 150                   | (27,1) | 44           | (29,5) | 45   | (29,6) | r/O                                  | 1,94  | 1,21  | 3,11    | 0,006        | 1,31 | 0,74 | 2,33    | 0,356  |
| O/O <sup>b</sup>                          | 112                   | (20,2) | 49           | (32,9) | 59   | (38,8) | O/O <sup>b</sup>                     | Ref   |       |         |              | Ref  |      |         |        |
|                                           |                       |        |              |        |      |        |                                      |       |       |         |              |      |      |         |        |
|                                           | Tanning               |        |              |        |      |        | Tanning (high=Ref)                   |       |       |         |              |      |      |         |        |
|                                           | low                   |        | intermediate |        | high |        | low                                  |       |       |         | intermediate |      |      |         |        |
|                                           | n                     | %      | n            | %      | n    | %      | OR                                   | 0,95  | CI    | P Value | OR           | 0,95 | CI   | P Value |        |
| R/R                                       | 15                    | (23,1) | 31           | (4,7)  | 2    | (1,3)  | R/R                                  | 66,92 | 11,71 | 382,46  | <0,001       | 4,07 | 0,94 | 17,67   | 0,061  |
| R/r                                       | 14                    | (21,5) | 87           | (13,1) | 6    | (3,8)  | R/r                                  | 19,70 | 5,19  | 74,74   | <0,001       | 3,66 | 1,50 | 8,92    | 0,004  |
| R/O                                       | 12                    | (18,5) | 137          | (20,6) | 38   | (24,4) | R/O                                  | 2,75  | 0,89  | 8,52    | 0,080        | 0,93 | 0,57 | 1,51    | 0,757  |
| r/r                                       | 9                     | (13,8) | 52           | (7,8)  | 10   | (6,4)  | r/r                                  | 7,79  | 2,14  | 28,39   | 0,002        | 1,34 | 0,63 | 2,85    | 0,441  |
| r/O                                       | 10                    | (15,4) | 182          | (27,4) | 53   | (34,0) | r/O                                  | 1,76  | 0,56  | 5,55    | 0,331        | 0,93 | 0,59 | 1,45    | 0,743  |
| O/O <sup>b</sup>                          | 5                     | (7,7)  | 175          | (26,4) | 47   | (30,1) | O/O <sup>b</sup>                     | Ref   |       |         |              | Ref  |      |         |        |
|                                           |                       |        |              |        |      |        |                                      |       |       |         |              |      |      |         |        |
|                                           | Burning               |        |              |        |      |        | Burning (low=Ref)                    |       |       |         |              |      |      |         |        |
|                                           | high                  |        | intermediate |        | low  |        | high                                 |       |       |         | intermediate |      |      |         |        |
|                                           | n                     | %      | n            | %      | n    | %      | OR                                   | 0,95  | CI    | P Value | OR           | 0,95 | CI   | P Value |        |
| R/R                                       | 18                    | (13,4) | 22           | (4,5)  | 8    | (3,0)  | R/R                                  | 11,32 | 4,28  | 29,93   | <0,001       | 2,72 | 1,15 | 6,43    | 0,023  |
| R/r                                       | 29                    | (21,6) | 59           | (12,1) | 19   | (7,2)  | R/r                                  | 6,90  | 3,23  | 14,76   | <0,001       | 2,82 | 1,56 | 5,10    | 0,001  |
| R/O                                       | 32                    | (23,9) | 113          | (23,2) | 42   | (16,0) | R/O                                  | 3,59  | 1,84  | 7,02    | <0,001       | 2,50 | 1,59 | 3,93    | <0,001 |
| r/r                                       | 13                    | (9,7)  | 40           | (8,2)  | 18   | (6,8)  | r/r                                  | 3,47  | 1,46  | 8,29    | 0,005        | 2,14 | 1,14 | 4,01    | 0,017  |
| r/O                                       | 22                    | (16,4) | 148          | (30,3) | 75   | (28,5) | r/O                                  | 1,56  | 0,79  | 3,09    | 0,199        | 2,01 | 1,35 | 2,98    | 0,001  |
| O/O <sup>b</sup>                          | 20                    | (14,9) | 106          | (21,7) | 101  | (38,4) | O/O <sup>b</sup>                     | Ref   |       |         |              | Ref  |      |         |        |

| Combination of MC1R variants <sup>a</sup> | Variable <sup>c</sup> |        |       |        |             |        |             |        | Adjusted for age and melanoma status |       |       |         |        |      |      |         |             |      |      |         |       |
|-------------------------------------------|-----------------------|--------|-------|--------|-------------|--------|-------------|--------|--------------------------------------|-------|-------|---------|--------|------|------|---------|-------------|------|------|---------|-------|
|                                           | Haircolor             |        |       |        |             |        |             |        | Haircolor ( brown/black=Ref)         |       |       |         |        |      |      |         |             |      |      |         |       |
|                                           | red                   |        | blond |        | light brown |        | brown/black |        | red                                  |       |       |         | blond  |      |      |         | light brown |      |      |         |       |
|                                           | n                     | %      | n     | %      | n           | %      | n           | %      | OR                                   | 0,95  | CI    | P Value | OR     | 0,95 | CI   | P Value | OR          | 0,95 | CI   | P Value |       |
| R/R                                       | 18                    | (40,0) | 9     | (5,2)  | 5           | (2,5)  | 16          | (3,4)  | R/R                                  | 51,27 | 13,54 | 194,07  | <0,001 | 2,36 | 0,95 | 5,82    | 0,063       | 0,91 | 0,32 | 2,63    | 0,865 |
| R/r                                       | 11                    | (24,4) | 31    | (17,9) | 23          | (11,4) | 42          | (9,0)  | R/r                                  | 11,52 | 3,05  | 43,51   | <0,001 | 3,12 | 1,70 | 5,73    | <0,001      | 1,66 | 0,90 | 3,04    | 0,102 |
| R/0                                       | 8                     | (17,8) | 38    | (22,0) | 47          | (23,4) | 94          | (20,1) | R/0                                  | 3,81  | 0,98  | 14,77   | 0,053  | 1,71 | 1,00 | 2,93    | 0,051       | 1,49 | 0,92 | 2,41    | 0,102 |
| r/r                                       | 1                     | (2,2)  | 15    | (8,7)  | 20          | (10,0) | 35          | (7,5)  | r/r                                  | 1,23  | 0,12  | 12,22   | 0,860  | 1,73 | 0,84 | 3,56    | 0,134       | 1,70 | 0,89 | 3,22    | 0,105 |
| r/0                                       | 4                     | (8,9)  | 47    | (27,2) | 57          | (28,4) | 138         | (29,6) | r/0                                  | 1,34  | 0,29  | 6,11    | 0,705  | 1,41 | 0,85 | 2,35    | 0,180       | 1,19 | 0,76 | 1,86    | 0,450 |
| 0/0 <sup>b</sup>                          | 3                     | (6,7)  | 33    | (19,1) | 49          | (24,4) | 142         | (30,4) | 0/0 <sup>b</sup>                     | Ref   |       |         |        | Ref  |      |         |             | Ref  |      |         |       |
|                                           | <b>Freckles</b>       |        |       |        |             |        |             |        | <b>Freckles (no=Ref)</b>             |       |       |         |        |      |      |         |             |      |      |         |       |
|                                           | <b>yes</b>            |        |       |        | <b>no</b>   |        |             |        | <b>yes</b>                           |       |       |         |        |      |      |         |             |      |      |         |       |
|                                           | n                     | %      | n     | %      |             |        |             |        | OR                                   | 0,95  | CI    | P Value |        |      |      |         |             |      |      |         |       |
| R/R                                       | 37                    | (16,0) | 9     | (1,5)  |             |        |             |        | R/R                                  | 28,36 | 12,32 | 65,32   | <0,001 |      |      |         |             |      |      |         |       |
| R/r                                       | 56                    | (24,2) | 48    | (8,1)  |             |        |             |        | R/r                                  | 7,51  | 4,30  | 13,12   | <0,001 |      |      |         |             |      |      |         |       |
| R/0                                       | 44                    | (19,0) | 125   | (21,2) |             |        |             |        | R/0                                  | 2,29  | 1,35  | 3,89    | 0,002  |      |      |         |             |      |      |         |       |
| r/r                                       | 27                    | (11,7) | 39    | (6,6)  |             |        |             |        | r/r                                  | 4,64  | 2,45  | 8,76    | <0,001 |      |      |         |             |      |      |         |       |
| r/0                                       | 39                    | (16,9) | 180   | (30,5) |             |        |             |        | r/0                                  | 1,51  | 0,89  | 2,55    | 0,129  |      |      |         |             |      |      |         |       |
| 0/0 <sup>b</sup>                          | 28                    | (12,1) | 190   | (32,1) |             |        |             |        | 0/0 <sup>b</sup>                     | Ref   |       |         |        |      |      |         |             |      |      |         |       |

Abbreviations: AOR= adjusted Odds Ratio; CI=Confidence Interval; Ref=Reference group

<sup>a</sup>= R= 86\_87insA, R142H, R151C, R160W, D294H; r= V60L, D84E, V92M, I155T, R163Q

<sup>b</sup>=participants who did not carry any "r" or "R"

<sup>c</sup>The single variables do not sum up to the total number of females and males because of missing data

**eTable 4b. MC1R variants and pigmentation phenotype in females**

| Combination of MC1R variants <sup>a</sup> | Variable <sup>c</sup> |        |              |        |      |        | Adjusted for age and melanoma status |       |      |       |         |              |      |       |         |
|-------------------------------------------|-----------------------|--------|--------------|--------|------|--------|--------------------------------------|-------|------|-------|---------|--------------|------|-------|---------|
|                                           | Skin Phototype        |        |              |        |      |        | Skin Phototype (IV/V=Ref)            |       |      |       |         |              |      |       |         |
|                                           | I/II                  |        | III          |        | IV/V |        | I/II                                 |       |      |       | III     |              |      |       |         |
|                                           | n                     | %      | n            | %      | n    | %      |                                      | AOR   | 0,95 | CI    | P Value | AOR          | 0,95 | CI    | P Value |
| R/R                                       | 43                    | (6,9)  | 3            | (2,3)  | 2    | (1,7)  | R/R                                  | 6,26  | 1,45 | 26,98 | 0,014   | 1,56         | 0,25 | 9,83  | 0,637   |
| R/r                                       | 96                    | (15,4) | 9            | (6,9)  | 6    | (5,2)  | R/r                                  | 4,88  | 1,99 | 11,96 | 0,001   | 1,75         | 0,57 | 5,37  | 0,330   |
| R/O                                       | 107                   | (17,1) | 22           | (16,8) | 18   | (15,7) | R/O                                  | 1,87  | 1,02 | 3,43  | 0,042   | 1,41         | 0,66 | 3,00  | 0,371   |
| r/r                                       | 54                    | (8,6)  | 8            | (6,1)  | 5    | (4,3)  | r/r                                  | 3,51  | 1,32 | 9,36  | 0,012   | 1,86         | 0,56 | 6,17  | 0,308   |
| r/O                                       | 181                   | (29,0) | 46           | (35,1) | 36   | (31,3) | r/O                                  | 1,57  | 0,96 | 2,56  | 0,073   | 1,40         | 0,76 | 2,57  | 0,276   |
| O/O <sup>b</sup>                          | 144                   | (23,0) | 43           | (32,8) | 48   | (41,7) | O/O <sup>b</sup>                     | Ref   |      |       |         | Ref          |      |       |         |
|                                           | Tanning               |        |              |        |      |        | Tanning (high=Ref)                   |       |      |       |         |              |      |       |         |
|                                           | low                   |        | intermediate |        | high |        |                                      | low   |      |       |         | intermediate |      |       |         |
|                                           | n                     | %      | n            | %      | n    | %      |                                      | OR    | 0,95 | CI    | P Value | OR           | 0,95 | CI    | P Value |
| R/R                                       | 12                    | (12,5) | 33           | (4,7)  | 4    | (3,7)  | R/R                                  | 10,56 | 2,77 | 40,31 | 0,001   | 1,37         | 0,46 | 4,13  | 0,573   |
| R/r                                       | 23                    | (24,0) | 84           | (12,0) | 6    | (5,6)  | R/r                                  | 12,55 | 3,98 | 39,55 | <0,001  | 2,41         | 0,97 | 5,98  | 0,058   |
| R/O                                       | 20                    | (20,8) | 112          | (16,0) | 19   | (17,6) | R/O                                  | 3,50  | 1,36 | 9,02  | 0,010   | 1,03         | 0,56 | 1,90  | 0,916   |
| r/r                                       | 8                     | (8,3)  | 58           | (8,3)  | 3    | (2,8)  | r/r                                  | 9,00  | 2,00 | 40,50 | 0,004   | 3,41         | 1,01 | 11,50 | 0,048   |
| r/O                                       | 23                    | (24,0) | 209          | (29,9) | 40   | (37,0) | r/O                                  | 1,99  | 0,83 | 4,77  | 0,121   | 0,90         | 0,55 | 1,48  | 0,680   |
| O/O <sup>b</sup>                          | 10                    | (10,4) | 203          | (29,0) | 36   | (33,3) | O/O <sup>b</sup>                     | Ref   |      |       |         | Ref          |      |       |         |



|           |                       |  |  |  |                                      |
|-----------|-----------------------|--|--|--|--------------------------------------|
| Combinati | Variable <sup>c</sup> |  |  |  | Adjusted for age and melanoma status |
|-----------|-----------------------|--|--|--|--------------------------------------|

|                        | Burning |        |              |        |     |        |                  | Burning (low=Ref) |      |       |         |              |      |      |         |
|------------------------|---------|--------|--------------|--------|-----|--------|------------------|-------------------|------|-------|---------|--------------|------|------|---------|
|                        | high    |        | intermediate |        | low |        |                  | high              |      |       |         | intermediate |      |      |         |
|                        | n       | %      | n            | %      | n   | %      |                  | OR                | 0,95 | CI    | P Value | OR           | 0,95 | CI   | P Value |
| <b>R/R</b>             | 19      | (11,4) | 24           | (5,0)  | 6   | (2,4)  | R/R              | 10,87             | 3,87 | 30,57 | <0,001  | 2,61         | 1,02 | 6,67 | 0,046   |
| <b>R/r</b>             | 30      | (18,0) | 65           | (13,5) | 18  | (7,1)  | R/r              | 5,31              | 2,51 | 11,22 | <0,001  | 2,49         | 1,37 | 4,51 | 0,003   |
| <b>R/0</b>             | 30      | (18,0) | 81           | (16,8) | 41  | (16,2) | R/0              | 2,46              | 1,27 | 4,75  | 0,008   | 1,39         | 0,87 | 2,22 | 0,166   |
| <b>r/r</b>             | 14      | (8,4)  | 42           | (8,7)  | 13  | (5,1)  | r/r              | 3,76              | 1,54 | 9,13  | 0,004   | 2,31         | 1,17 | 4,58 | 0,016   |
| <b>r/0</b>             | 50      | (29,9) | 140          | (29,0) | 81  | (32,0) | r/0              | 2,17              | 1,22 | 3,87  | 0,009   | 1,18         | 0,80 | 1,74 | 0,401   |
| <b>0/0<sup>b</sup></b> | 24      | (14,4) | 131          | (27,1) | 94  | (37,2) | 0/0 <sup>b</sup> | Ref               |      |       |         | Ref          |      |      |         |

| on of<br>MC1R<br>variants <sup>a</sup> |                 |            |         |             |           |            |         |            | Haircolor ( brown/black=Ref) |            |           |            |            |          |          |           |             |          |          |          |       |  |
|----------------------------------------|-----------------|------------|---------|-------------|-----------|------------|---------|------------|------------------------------|------------|-----------|------------|------------|----------|----------|-----------|-------------|----------|----------|----------|-------|--|
|                                        | Haircolor       |            |         |             |           |            |         |            | red                          |            |           |            | blond      |          |          |           | light brown |          |          |          |       |  |
|                                        | n               | %          | n       | %           | n         | %          | n       | %          | OR                           | 0,95       | CI        | P Value    | OR         | 0,95     | CI       | P Value   | OR          | 0,95     | CI       | P Value  |       |  |
| <b>R/R</b>                             | 3<br>2          | (40,<br>0) | 9       | (4,3)       | 4         | (1,6)      | 4       | (1,1)      | <b>R/<br/>R</b>              | 135,6<br>1 | 37,2<br>6 | 493,5<br>5 | <0,00<br>1 | 5,5<br>7 | 1,6<br>3 | 19,0<br>3 | 0,006       | 1,7<br>9 | 0,4<br>3 | 7,4<br>1 | 0,419 |  |
| <b>R/r</b>                             | 1<br>2          | (15,<br>0) | 43      | (20,7)      | 3<br>4    | (13,<br>8) | 24      | (6,5)      | <b>R/r</b>                   | 8,04       | 2,84      | 22,73      | <0,00<br>1 | 4,1<br>1 | 2,2<br>4 | 7,54      | <0,00<br>1  | 2,5<br>7 | 1,4<br>0 | 4,7<br>2 | 0,002 |  |
| <b>R/0</b>                             | 1<br>0          | (12,<br>5) | 36      | (17,3)      | 4<br>6    | (18,<br>7) | 60      | (16,2<br>) | <b>R/<br/>0</b>              | 2,75       | 0,99      | 7,63       | 0,052      | 1,4<br>1 | 0,8<br>3 | 2,42      | 0,207       | 1,3<br>8 | 0,8<br>5 | 2,2<br>5 | 0,194 |  |
| <b>r/r</b>                             | 5               | (6,3)      | 17      | (8,2)       | 1<br>9    | (7,7)      | 28      | (7,6)      | <b>r/r</b>                   | 2,98       | 0,88      | 10,13      | 0,080      | 1,4<br>5 | 0,7<br>3 | 2,90      | 0,292       | 1,2<br>2 | 0,6<br>3 | 2,3<br>5 | 0,553 |  |
| <b>r/0</b>                             | 1<br>4          | (17,<br>5) | 55      | (26,4)      | 7<br>3    | (29,<br>7) | 13<br>0 | (35,1<br>) | <b>r/0</b>                   | 1,82       | 0,71      | 4,68       | 0,213      | 1,0<br>4 | 0,6<br>5 | 1,65      | 0,880       | 1,0<br>1 | 0,6<br>7 | 1,5<br>2 | 0,973 |  |
| <b>0/0<sup>b</sup></b>                 | 7               | (8,8)      | 48      | (23,1)      | 7<br>0    | (28,<br>5) | 12<br>4 | (33,5<br>) | <b>0/0<sup>b</sup></b>       | Ref        |           |            |            | Ref      |          |           |             | Ref      |          |          |       |  |
|                                        |                 |            |         |             |           |            |         |            |                              |            |           |            |            |          |          |           |             |          |          |          |       |  |
|                                        |                 |            |         |             |           |            |         |            |                              |            |           |            |            |          |          |           |             |          |          |          |       |  |
|                                        | <b>Freckles</b> |            |         |             |           |            |         |            | <b>Freckles (no=Ref)</b>     |            |           |            |            |          |          |           |             |          |          |          |       |  |
|                                        | <b>yes</b>      |            |         |             | <b>no</b> |            |         |            | <b>yes</b>                   |            |           |            |            |          |          |           |             |          |          |          |       |  |
|                                        | n               | %          | n       | %           |           |            |         |            | OR                           | 0,95       | CI        | P Value    |            |          |          |           |             |          |          |          |       |  |
| <b>R/R</b>                             | 4<br>1          | (12,7)     | 7       | (1,<br>3)   |           |            |         |            | <b>R/<br/>R</b>              | 35,50      | 14,5<br>9 | 86,41      | <0,00<br>1 |          |          |           |             |          |          |          |       |  |
| <b>R/r</b>                             | 7<br>0          | (21,7)     | 40      | (7,<br>2)   |           |            |         |            | <b>R/r</b>                   | 11,37      | 6,60      | 19,61      | <0,00<br>1 |          |          |           |             |          |          |          |       |  |
| <b>R/0</b>                             | 6<br>8          | (21,1)     | 78      | (14,<br>.1) |           |            |         |            | <b>R/<br/>0</b>              | 5,58       | 3,40      | 9,16       | <0,00<br>1 |          |          |           |             |          |          |          |       |  |
| <b>r/r</b>                             | 2<br>2          | (6,8)      | 44      | (8,<br>0)   |           |            |         |            | <b>r/r</b>                   | 3,11       | 1,65      | 5,86       | <0,00<br>1 |          |          |           |             |          |          |          |       |  |
| <b>r/0</b>                             | 8<br>6          | (26,6)     | 17<br>8 | (32,<br>.2) |           |            |         |            | <b>r/0</b>                   | 2,80       | 1,80      | 4,38       | <0,00<br>1 |          |          |           |             |          |          |          |       |  |
| <b>0/0<sup>b</sup></b>                 | 3<br>6          | (11,1)     | 20<br>5 | (37,<br>.1) |           |            |         |            | <b>0/0<sup>b</sup></b>       | Ref        |           |            |            |          |          |           |             |          |          |          |       |  |

Abbreviations: AOR= adjusted Odds Ratio; CI=Confidence Interval; Ref=Reference group

<sup>a</sup>= R= 86\_87insA, R142H, R151C, R160W, D294H; r= V60L, D84E, V92M, I155T, R163Q

<sup>b</sup>=participants who did not carry any "r" or "R"

<sup>c</sup>The single variables do not sum up to the total number of females and males because of missing data

**eTable 5a. MC1R variants and pigmentation phenotype in Cases**

| Combination of MC1R variants <sup>a</sup> | Variable <sup>c</sup> |        |              |        |      |        | Adjusted for age and sex |       |      |         |              |      |      |         |       |
|-------------------------------------------|-----------------------|--------|--------------|--------|------|--------|--------------------------|-------|------|---------|--------------|------|------|---------|-------|
|                                           | Skin Phototype        |        |              |        |      |        | Skin Phototype (I/V=Ref) |       |      |         |              |      |      |         |       |
|                                           | I/II                  |        | III          |        | IV/V |        | I/II                     |       |      |         | III          |      |      |         |       |
|                                           | n                     | %      | n            | %      | n    | %      | AOR                      | 0,95  | CI   | P Value | AOR          | 0,95 | CI   | P Value |       |
| R/R                                       | 48                    | (6,8)  | 2            | (1,4)  | 5    | (4,5)  | R/R                      | 3,35  | 1,24 | 9,03    | 0,017        | 0,38 | 0,07 | 2,08    | 0,265 |
| R/r                                       | 131                   | (18,6) | 11           | (8,0)  | 6    | (5,4)  | R/r                      | 7,44  | 3,05 | 18,20   | 0,000        | 1,68 | 0,57 | 4,98    | 0,346 |
| R/O                                       | 148                   | (21,1) | 32           | (23,2) | 21   | (18,9) | R/O                      | 2,55  | 1,43 | 4,56    | 0,002        | 1,46 | 0,73 | 2,93    | 0,287 |
| r/r                                       | 63                    | (9,0)  | 11           | (8,0)  | 4    | (3,6)  | r/r                      | 5,75  | 1,96 | 16,82   | 0,001        | 2,71 | 0,80 | 9,20    | 0,111 |
| r/O                                       | 192                   | (27,3) | 37           | (26,8) | 32   | (28,8) | r/O                      | 2,08  | 1,24 | 3,49    | 0,005        | 1,10 | 0,58 | 2,09    | 0,764 |
| O/O <sup>b</sup>                          | 121                   | (17,2) | 45           | (32,6) | 43   | (38,7) | O/O <sup>b</sup>         | Ref   |      |         |              | Ref  |      |         |       |
|                                           | Tanning               |        |              |        |      |        | Tanning (high=Ref)       |       |      |         |              |      |      |         |       |
|                                           | low                   |        | intermediate |        | high |        | low                      |       |      |         | intermediate |      |      |         |       |
|                                           | n                     | %      | n            | %      | n    | %      | OR                       | 0,95  | CI   | P Value | OR           | 0,95 | CI   | P Value |       |
| R/R                                       | 16                    | (15,5) | 40           | (5,3)  | 3    | (2,4)  | R/R                      | 27,94 | 6,36 | 122,79  | 0,000        | 2,70 | 0,79 | 9,24    | 0,113 |
| R/r                                       | 27                    | (26,2) | 121          | (15,9) | 4    | (3,1)  | R/r                      | 35,02 | 9,27 | 132,37  | 0,000        | 6,05 | 2,10 | 17,48   | 0,001 |
| R/O                                       | 27                    | (26,2) | 152          | (20,0) | 30   | (23,6) | R/O                      | 4,79  | 1,82 | 12,59   | 0,001        | 1,06 | 0,62 | 1,80    | 0,837 |
| r/r                                       | 12                    | (11,7) | 67           | (8,8)  | 5    | (3,9)  | r/r                      | 12,57 | 3,34 | 47,28   | 0,000        | 2,84 | 1,07 | 7,56    | 0,037 |
| r/O                                       | 14                    | (13,6) | 206          | (27,1) | 49   | (38,6) | r/O                      | 1,40  | 0,51 | 3,83    | 0,513        | 0,85 | 0,52 | 1,36    | 0,492 |
| O/O <sup>b</sup>                          | 7                     | (6,8)  | 173          | (22,8) | 36   | (28,3) | O/O <sup>b</sup>         | Ref   |      |         |              | Ref  |      |         |       |
|                                           | Burning               |        |              |        |      |        | Burning (low=Ref)        |       |      |         |              |      |      |         |       |
|                                           | high                  |        | intermediate |        | low  |        | high                     |       |      |         | intermediate |      |      |         |       |
|                                           | n                     | %      | n            | %      | n    | %      | OR                       | 0,95  | CI   | P Value | OR           | 0,95 | CI   | P Value |       |
| R/R                                       | 28                    | (13,3) | 24           | (4,4)  | 7    | (3,0)  | R/R                      | 11,06 | 4,33 | 28,21   | 0,000        | 2,39 | 0,98 | 5,85    | 0,056 |
| R/r                                       | 47                    | (22,4) | 88           | (16,1) | 17   | (7,3)  | R/r                      | 7,53  | 3,72 | 15,24   | 0,000        | 3,57 | 1,96 | 6,48    | 0,000 |
| R/O                                       | 50                    | (23,8) | 113          | (20,7) | 46   | (19,8) | R/O                      | 3,08  | 1,70 | 5,55    | 0,000        | 1,74 | 1,11 | 2,74    | 0,016 |
| r/r                                       | 15                    | (7,1)  | 54           | (9,9)  | 15   | (6,5)  | r/r                      | 2,82  | 1,22 | 6,52    | 0,015        | 2,63 | 1,38 | 5,02    | 0,003 |
| r/O                                       | 42                    | (20,0) | 158          | (28,9) | 69   | (29,7) | r/O                      | 1,65  | 0,92 | 2,94    | 0,091        | 1,62 | 1,08 | 2,44    | 0,021 |

| Combination of | Variable <sup>c</sup> |  |  | Adjusted for age and sex |
|----------------|-----------------------|--|--|--------------------------|
|----------------|-----------------------|--|--|--------------------------|

|                  |    |        |     |        |    |        |                  |     |  |  |     |  |  |  |
|------------------|----|--------|-----|--------|----|--------|------------------|-----|--|--|-----|--|--|--|
| 0/0 <sup>b</sup> | 28 | (13,3) | 110 | (20,1) | 78 | (33,6) | 0/0 <sup>b</sup> | Ref |  |  | Ref |  |  |  |
|------------------|----|--------|-----|--------|----|--------|------------------|-----|--|--|-----|--|--|--|

| MC1R variants <sup>a</sup> | Haircolor |        |       |        |             |        |             |        |                  | Haircolor ( brown/black=Ref) |       |         |         |       |      |      |         |             |      |      |         |
|----------------------------|-----------|--------|-------|--------|-------------|--------|-------------|--------|------------------|------------------------------|-------|---------|---------|-------|------|------|---------|-------------|------|------|---------|
|                            | red       |        | blond |        | light brown |        | brown/black |        |                  | red                          |       |         |         | blond |      |      |         | light brown |      |      |         |
|                            | n         | %      | n     | %      | n           | %      | n           | %      |                  | OR                           | 0,95  | CI      | P Value | OR    | 0,95 | CI   | P Value | OR          | 0,95 | CI   | P Value |
| R/R                        | 36        | (43,9) | 11    | (4,6)  | 2           | (,9)   | 10          | (2,2)  | R/R              | 239,29                       | 49,55 | 1155,68 | 0,000   | 3,46  | 1,36 | 8,79 | 3,46    | 0,50        | 0,11 | 2,38 | 0,385   |
| R/r                        | 16        | (19,5) | 57    | (23,8) | 40          | (17,9) | 39          | (8,8)  | R/r              | 25,36                        | 5,56  | 115,73  | 0,000   | 4,44  | 2,58 | 7,66 | 4,44    | 2,48        | 1,43 | 4,31 | 0,001   |
| R/0                        | 15        | (18,3) | 48    | (20,0) | 54          | (24,2) | 92          | (20,7) | R/0              | 10,56                        | 2,35  | 47,48   | 0,002   | 1,61  | 0,98 | 2,66 | 1,61    | 1,45        | 0,91 | 2,33 | 0,122   |
| r/r                        | 3         | (3,7)  | 18    | (7,5)  | 26          | (11,7) | 37          | (8,3)  | r/r              | 5,04                         | 0,81  | 31,44   | 0,083   | 1,46  | 0,75 | 2,84 | 1,46    | 1,70        | 0,93 | 3,10 | 0,086   |
| r/0                        | 10        | (12,2) | 65    | (27,1) | 50          | (22,4) | 145         | (32,6) | r/0              | 3,93                         | 0,84  | 18,34   | 0,081   | 1,29  | 0,81 | 2,04 | 1,29    | 0,79        | 0,50 | 1,26 | 0,329   |
| 0/0 <sup>b</sup>           | 2         | (2,4)  | 41    | (17,1) | 51          | (22,9) | 122         | (27,4) | 0/0 <sup>b</sup> | Ref                          |       |         |         | Ref   |      |      |         | Ref         |      |      |         |
|                            |           |        |       |        |             |        |             |        |                  |                              |       |         |         |       |      |      |         |             |      |      |         |
|                            | Freckles  |        |       |        |             |        |             |        |                  | Freckles (no=Ref)            |       |         |         |       |      |      |         |             |      |      |         |
|                            | yes       |        | no    |        |             |        |             |        |                  | yes                          |       |         |         |       |      |      |         |             |      |      |         |
|                            | n         | %      | n     | %      |             |        |             |        |                  | OR                           | 0,95  | CI      | P Value |       |      |      |         |             |      |      |         |
| R/R                        | 51        | (15,2) | 6     | (1,0)  |             |        |             |        | R/R              | 49,62                        | 19,51 | 126,18  | 0,000   |       |      |      |         |             |      |      |         |
| R/r                        | 87        | (26,0) | 60    | (10,0) |             |        |             |        | R/r              | 7,96                         | 4,80  | 13,19   | 0,000   |       |      |      |         |             |      |      |         |
| R/0                        | 67        | (20,0) | 125   | (20,9) |             |        |             |        | R/0              | 3,01                         | 1,86  | 4,89    | 0,000   |       |      |      |         |             |      |      |         |
| r/r                        | 26        | (7,8)  | 53    | (8,9)  |             |        |             |        | r/r              | 2,81                         | 1,53  | 5,15    | 0,001   |       |      |      |         |             |      |      |         |
| r/0                        | 72        | (21,5) | 178   | (29,8) |             |        |             |        | r/0              | 2,15                         | 1,34  | 3,45    | 0,001   |       |      |      |         |             |      |      |         |
| 0/0 <sup>b</sup>           | 32        | (9,6)  | 176   | (29,4) |             |        |             |        | 0/0 <sup>b</sup> | Ref                          |       |         |         |       |      |      |         |             |      |      |         |

Abbreviations: AOR= adjusted Odds Ratio; CI=Confidence Interval; Ref=Reference group

<sup>a</sup>= R= 86\_87insA, R142H, R151C, R160W, D294H; r= V60L, D84E, V92M, I155T, R163Q

<sup>b</sup>=participants who did not carry any "r" or "R"

<sup>c</sup>The single variables do not sum up to the total number of cases because of missing data

**eTable 5b. MC1R variants and pigmentation phenotype in Controls**

| Combination of <i>MC1R</i> variants <sup>a</sup> | Variable <sup>c</sup> |        |              |        |      |        | Adjusted for age and sex  |       |      |        |         |              |      |       |         |
|--------------------------------------------------|-----------------------|--------|--------------|--------|------|--------|---------------------------|-------|------|--------|---------|--------------|------|-------|---------|
|                                                  | Skin Phototype        |        |              |        |      |        | Skin Phototype (IV/V=Ref) |       |      |        |         |              |      |       |         |
|                                                  | I/II                  |        | III          |        | IV/V |        | I/II                      |       |      |        | III     |              |      |       |         |
|                                                  | n                     | %      | n            | %      | n    | %      |                           | AOR   | 0,95 | CI     | P Value | AOR          | 0,95 | CI    | P Value |
| R/R                                              | 29                    | (6,1)  | 5            | (3,5)  | 3    | (1,9)  | R/R                       | 4,95  | 1,44 | 17,02  | 0,011   | 2,46         | 0,56 | 10,91 | 0,236   |
| R/r                                              | 50                    | (10,5) | 8            | (5,6)  | 9    | (5,8)  | R/r                       | 3,03  | 1,39 | 6,59   | 0,005   | 1,43         | 0,51 | 4,04  | 0,494   |
| R/0                                              | 82                    | (17,2) | 21           | (14,8) | 24   | (15,4) | R/0                       | 1,78  | 1,02 | 3,09   | 0,042   | 1,31         | 0,65 | 2,65  | 0,455   |
| r/r                                              | 41                    | (8,6)  | 8            | (5,6)  | 7    | (4,5)  | r/r                       | 3,06  | 1,29 | 7,27   | 0,011   | 1,75         | 0,59 | 5,21  | 0,316   |
| r/0                                              | 139                   | (29,2) | 53           | (37,3) | 49   | (31,4) | r/0                       | 1,46  | 0,93 | 2,29   | 0,099   | 1,61         | 0,93 | 2,79  | 0,090   |
| 0/0 <sup>b</sup>                                 | 135                   | (28,4) | 47           | (33,1) | 64   | (41,0) | 0/0 <sup>b</sup>          | Ref   |      |        |         | Ref          |      |       |         |
|                                                  |                       |        |              |        |      |        |                           |       |      |        |         |              |      |       |         |
|                                                  | Tanning               |        |              |        |      |        | Tanning (high=Ref)        |       |      |        |         |              |      |       |         |
|                                                  | low                   |        | intermediate |        | high |        |                           | low   |      |        |         | intermediate |      |       |         |
|                                                  | n                     | %      | n            | %      | n    | %      |                           | OR    | 0,95 | CI     | P Value | OR           | 0,95 | CI    | P Value |
| R/R                                              | 11                    | (19,0) | 24           | (4,0)  | 3    | (2,2)  | R/R                       | 23,70 | 5,33 | 105,51 | 0,000   | 1,92         | 0,55 | 6,66  | 0,305   |
| R/r                                              | 10                    | (17,2) | 50           | (8,3)  | 8    | (5,8)  | R/r                       | 7,35  | 2,19 | 24,62  | 0,001   | 1,46         | 0,65 | 3,31  | 0,362   |
| R/0                                              | 5                     | (8,6)  | 97           | (16,1) | 27   | (19,7) | R/0                       | 1,16  | 0,34 | 3,94   | 0,809   | 0,86         | 0,50 | 1,47  | 0,579   |
| r/r                                              | 5                     | (8,6)  | 43           | (7,1)  | 8    | (5,8)  | r/r                       | 3,70  | 0,95 | 14,37  | 0,058   | 1,25         | 0,55 | 2,84  | 0,597   |
| r/0                                              | 19                    | (32,8) | 185          | (30,6) | 44   | (32,1) | r/0                       | 2,66  | 1,05 | 6,74   | 0,039   | 0,99         | 0,63 | 1,57  | 0,974   |
| 0/0 <sup>b</sup>                                 | 8                     | (13,8) | 205          | (33,9) | 47   | (34,3) | 0/0 <sup>b</sup>          | Ref   |      |        |         | Ref          |      |       |         |
|                                                  |                       |        |              |        |      |        |                           |       |      |        |         |              |      |       |         |
|                                                  | Burning               |        |              |        |      |        | Burning (low=Ref)         |       |      |        |         |              |      |       |         |
|                                                  | high                  |        | intermediate |        | low  |        |                           | high  |      |        |         | intermediate |      |       |         |

|                            |                       |  |  |  |  |  |                          |  |  |  |  |  |  |  |
|----------------------------|-----------------------|--|--|--|--|--|--------------------------|--|--|--|--|--|--|--|
| Combination of <i>MC1R</i> | Variable <sup>c</sup> |  |  |  |  |  | Adjusted for age and sex |  |  |  |  |  |  |  |
|----------------------------|-----------------------|--|--|--|--|--|--------------------------|--|--|--|--|--|--|--|

|                        | n  | %      | n   | %      | n   | %      |                  | OR   | 0,95 | CI    | P Value | OR   | 0,95 | CI   | P Value |
|------------------------|----|--------|-----|--------|-----|--------|------------------|------|------|-------|---------|------|------|------|---------|
| <b>R/R</b>             | 9  | (9,9)  | 22  | (5,2)  | 7   | (2,5)  | R/R              | 9,65 | 3,15 | 29,57 | 0,000   | 2,99 | 1,23 | 7,28 | 0,016   |
| <b>R/r</b>             | 12 | (13,2) | 36  | (8,5)  | 20  | (7,0)  | R/r              | 4,50 | 1,84 | 10,97 | 0,001   | 1,83 | 1,00 | 3,37 | 0,051   |
| <b>R/0</b>             | 12 | (13,2) | 81  | (19,1) | 37  | (13,0) | R/0              | 2,45 | 1,06 | 5,66  | 0,036   | 2,13 | 1,33 | 3,40 | 0,002   |
| <b>r/r</b>             | 12 | (13,2) | 28  | (6,6)  | 16  | (5,6)  | r/r              | 5,59 | 2,24 | 13,97 | 0,000   | 1,71 | 0,87 | 3,33 | 0,117   |
| <b>r/0</b>             | 30 | (33,0) | 130 | (30,7) | 87  | (30,6) | r/0              | 2,59 | 1,33 | 5,06  | 0,005   | 1,44 | 0,99 | 2,10 | 0,056   |
| <b>0/0<sup>b</sup></b> | 16 | (17,6) | 127 | (30,0) | 117 | (41,2) | 0/0 <sup>b</sup> | Ref  |      |       |         | Ref  |      |      |         |

| variants <sup>a</sup> |           |        |       |        |                  |        |             |                   |                  |       |      | Haircolor ( brown/black=Ref) |       |      |      |         |             |      |      |         |       |  |  |
|-----------------------|-----------|--------|-------|--------|------------------|--------|-------------|-------------------|------------------|-------|------|------------------------------|-------|------|------|---------|-------------|------|------|---------|-------|--|--|
|                       | Haircolor |        |       |        |                  |        |             |                   |                  |       |      |                              |       |      |      |         |             |      |      |         |       |  |  |
|                       | red       |        | blond |        | light brown      |        | brown/black |                   | red              |       |      |                              | blond |      |      |         | light brown |      |      |         |       |  |  |
|                       | n         | %      | n     | %      | n                | %      | n           | %                 | OR               | 0,95  | CI   | P Value                      | OR    | 0,95 | CI   | P Value | OR          | 0,95 | CI   | P Value |       |  |  |
| R/R                   | 14        | (32,6) | 7     | (5,0)  | 7                | (3,1)  | 10          | (2,6)             | R/R              | 29,26 | 9,68 | 88,46                        | 0,000 | 2,64 | 0,94 | 7,43    | 0,066       | 1,55 | 0,56 | 4,27    | 0,394 |  |  |
| R/r                   | 7         | (16,3) | 17    | (12,1) | 17               | (7,6)  | 27          | (6,9)             | R/r              | 4,69  | 1,54 | 14,28                        | 0,007 | 2,10 | 1,03 | 4,27    | 0,041       | 1,36 | 0,69 | 2,68    | 0,371 |  |  |
| R/0                   | 3         | (7,0)  | 26    | (18,4) | 39               | (17,4) | 62          | (15,8)            | R/0              | 0,94  | 0,24 | 3,68                         | 0,928 | 1,50 | 0,84 | 2,69    | 0,172       | 1,38 | 0,84 | 2,26    | 0,207 |  |  |
| r/r                   | 3         | (7,0)  | 14    | (9,9)  | 13               | (5,8)  | 26          | (6,6)             | r/r              | 2,10  | 0,52 | 8,53                         | 0,300 | 1,87 | 0,88 | 3,94    | 0,101       | 1,07 | 0,52 | 2,22    | 0,853 |  |  |
| r/0                   | 8         | (18,6) | 37    | (26,2) | 80               | (35,7) | 123         | (31,4)            | r/0              | 1,23  | 0,45 | 3,40                         | 0,688 | 1,06 | 0,64 | 1,77    | 0,819       | 1,41 | 0,94 | 2,11    | 0,099 |  |  |
| 0/0 <sup>b</sup>      | 8         | (18,6) | 40    | (28,4) | 68               | (30,4) | 144         | (36,7)            | 0/0 <sub>b</sub> | Ref   |      |                              |       | Ref  |      |         |             | Ref  |      |         |       |  |  |
| Freckles              |           |        |       |        |                  |        |             |                   |                  |       |      |                              |       |      |      |         |             |      |      |         |       |  |  |
| Freckles              |           |        |       |        |                  |        |             | Freckles (no=Ref) |                  |       |      |                              |       |      |      |         |             |      |      |         |       |  |  |
| yes                   |           |        |       | no     |                  |        |             | yes               |                  |       |      |                              |       |      |      |         |             |      |      |         |       |  |  |
| n                     | %         | n      | %     |        |                  |        |             |                   |                  |       |      |                              |       |      |      |         |             |      |      |         |       |  |  |
| n                     | %         | n      | %     | OR     | 0,95             | CI     | P Value     |                   |                  |       |      |                              |       |      |      |         |             |      |      |         |       |  |  |
| R/R                   | 27        | (12,3) | 10    | (1,8)  | R/R              | 21,92  | 9,48        | 50,72             | 0,000            |       |      |                              |       |      |      |         |             |      |      |         |       |  |  |
| R/r                   | 39        | (17,8) | 28    | (5,1)  | R/r              | 11,60  | 6,17        | 21,82             | 0,000            |       |      |                              |       |      |      |         |             |      |      |         |       |  |  |
| R/0                   | 45        | (20,5) | 78    | (14,3) | R/0              | 4,56   | 2,67        | 7,80              | 0,000            |       |      |                              |       |      |      |         |             |      |      |         |       |  |  |
| r/r                   | 23        | (10,5) | 30    | (5,5)  | r/r              | 5,94   | 3,02        | 11,68             | 0,000            |       |      |                              |       |      |      |         |             |      |      |         |       |  |  |
| r/0                   | 53        | (24,2) | 180   | (33,0) | r/0              | 2,17   | 1,33        | 3,53              | 0,002            |       |      |                              |       |      |      |         |             |      |      |         |       |  |  |
| 0/0 <sup>b</sup>      | 32        | (14,6) | 219   | (40,2) | 0/0 <sub>b</sub> | Ref    |             |                   |                  |       |      |                              |       |      |      |         |             |      |      |         |       |  |  |

Abbreviations: AOR= adjusted Odds Ratio; CI=Confidence Interval; Ref=Reference group  
<sup>a</sup>= R= 86\_87insA, R142H, R151C, R160W, D294H; r= V60L, D84E, V92M, I155T, R163Q



<sup>b</sup>=participants who did not carry any “r” or “R”

<sup>c</sup>The single variables do not sum up to the total number of controls because of missing data
